# Supplementary material for: Intra-individual variability of eGFR trajectories in early diabetic kidney disease and lack of performance of prognostic biomarkers
Source: PubMed Central journal article supplement (PMC7665005; doi:10.1038/s41598-020-76773-0), 2020-11-12
Supplement: 41598_2020_76773_MOESM1_ESM.pdf [file 41598_2020_76773_MOESM1_ESM.pdf]

Supplemental material to

INTRA-INDIVIDUAL VARIABILITY OF eGFR TRAJECTORIES IN EARLY DIABETIC KIDNEY DISEASE  
AND LACK OF PERFORMANCE OF PROGNOSTIC BIOMARKERS

Julia Kerschbaum<sup>1\*</sup>, MD, Michael Rudnicki<sup>1</sup>, MD, Alexander Dzien<sup>2</sup>, MD, Christine Dzien-Bischinger<sup>2</sup>, MD, Hannes Winner<sup>3</sup>, PhD, Hiddo Lambers Heerspink<sup>4</sup>, PhD, László Rosivall<sup>5</sup>, PhD, Andrzej Wiecek<sup>6</sup>, MD, PhD, Patrick B. Mark, PhD, Susanne Eder<sup>1</sup>, PhD, Sara Denicolò<sup>1</sup>, MD, Gert Mayer<sup>1</sup>, MD

<sup>1</sup> Department of Internal Medicine IV (Nephrology and Hypertension), Medical University Innsbruck, Innsbruck, Austria

<sup>2</sup> Medical Center Hentschelhof, Innsbruck, Austria

<sup>3</sup> Department of Economics and Social Sciences, Paris-Lodron-University Salzburg, Salzburg, Austria

<sup>4</sup> Department of Clinical Pharmacy and Pharmacology, University of Groningen, University Medical Center Groningen, Groningen, The Netherlands

<sup>5</sup> International Nephrology Research and Training Centre, Institute of Translational Medicine, Semmelweis University, Budapest, Hungary

<sup>6</sup> Department of Nephrology, Transplantation and Internal Medicine, Medical University of Silesia, Katowice, Poland

<sup>7</sup> Institute of Cardiovascular & Medical Sciences, University of Glasgow, Glasgow, UK

**Corresponding author:**

Julia Kerschbaum, MD, MSc, MPH

Department of Internal Medicine (Nephrology and Hypertension)

Medical University Innsbruck

Anichstrasse 35

6020 Innsbruck

Austria

Tel.: 0043 512 504 81333

Fax: 0043 512 504 25857

Email: [julia.kerschbaum@i-med.ac.at](mailto:julia.kerschbaum@i-med.ac.at)

## Supplemental materials

### Supplementary table 1

#### Characteristics of the study populations

|                                                                                   | PROVALID<br>cohort<br>(n = 860) | Validation<br>cohort<br>(n = 178) | p-value |
|-----------------------------------------------------------------------------------|---------------------------------|-----------------------------------|---------|
| Baseline age (years)                                                              | 64.0 ± 9.6                      | 66.3 ± 11.4                       | 0.005   |
| Males (n/%)                                                                       | 471 (54.8)                      | 91 (51.1)                         | 0.375   |
| Baseline eGFR (ml/min/1.73m <sup>2</sup> )                                        | 81.8 ± 23.1                     | 72.5 ± 16.7                       | 0.001   |
| eGFR last follow up<br>(ml/min/1.73m <sup>2</sup> )                               | 74.6 ± 22.9                     | 65.7 ± 18.2                       | 0.001   |
| Mean duration of diabetes at<br>baseline (years)                                  | 10.9 ± 8.3                      | 6.5 ± 5.9                         | 0.001   |
| Systolic blood pressure at baseline<br>(mmHg)                                     | 136.5 ± 16.4                    | 145.5 ± 17.6                      | 0.001   |
| Diastolic blood pressure at baseline<br>(mmHg)                                    | 79.1 ± 9.6                      | 85.5 ± 8.4                        | 0.001   |
| BMI at baseline (kg/m <sup>2</sup> )                                              | 30.1 ± 4.1                      | 27.8 ± 4.1                        | 0.001   |
| HbA1c at baseline (%)                                                             | 6.9 ± 1.0                       | 6.4 ± 1.0                         | 0.001   |
| stable on RAS blocking therapy<br>during follow up (%)                            | 77.1                            | 80.3                              | 0.343   |
| Prevalent heart failure at baseline<br>(%)                                        | 2.2                             | 6.2                               | 0.004   |
| Prevalent other CV or peripheral<br>arterial disease at baseline (%) <sup>†</sup> | 18.4                            | 26.4                              | 0.014   |
| Prevalent cerebrovascular disease<br>at baseline (%) <sup>‡</sup>                 | 6.6                             | 6.2                               | 0.826   |

<sup>†</sup> history of myocardial infarction or coronary revascularization.

<sup>‡</sup> history of stroke or TIA

Supplementary table 2

Intra-individual stability of an eGFR decline  $\geq 25$ ,  $\geq 35$  or  $\geq 40$  over time

|                  | eGFR decline $\geq 25\%$ from baseline until |                            |                            |                            |                            |
|------------------|----------------------------------------------|----------------------------|----------------------------|----------------------------|----------------------------|
|                  | 1 <sup>st</sup> year of FU                   | 2 <sup>nd</sup> year of FU | 3 <sup>rd</sup> year of FU | 4 <sup>th</sup> year of FU | 5 <sup>th</sup> year of FU |
| PROVALID (n=860) |                                              |                            |                            |                            |                            |
| FU1 (n/%)        | 51 (100)                                     | <b>25 (49.0)</b>           | <b>17 (33.3)</b>           | <b>14 (27.5)</b>           | <b>12 (23.5)</b>           |
| FU2 (n/%)        | 25 (25.3)                                    | 99 (100)                   | <b>54 (54.5)</b>           | <b>42 (42.4)</b>           | <b>39 (39.4)</b>           |
| FU3 (n/%)        | 27 (21.3)                                    | 54 (42.5)                  | 127 (100)                  | <b>82 (64.6)</b>           | <b>67 (52.8)</b>           |
| FU4 (n/%)        | 27 (18.0)                                    | 55 (36.7)                  | 82 (54.7)                  | 150 (100)                  | <b>98 (65.3)</b>           |
| FU5 (n/%)        | 33 (19.0)                                    | 63 (36.2)                  | 80 (46.0)                  | 98 (46.0)                  | 174 (100)                  |
|                  | eGFR decline $\geq 35\%$ from baseline until |                            |                            |                            |                            |
|                  | 1 <sup>st</sup> year of FU                   | 2 <sup>nd</sup> year of FU | 3 <sup>rd</sup> year of FU | 4 <sup>th</sup> year of FU | 5 <sup>th</sup> year of FU |
| PROVALID (n=860) |                                              |                            |                            |                            |                            |
| FU1 (n/%)        | 10 (100)                                     | <b>2 (20.0)</b>            | <b>2 (20.0)</b>            | <b>2 (20.0)</b>            | <b>2 (20.0)</b>            |
| FU2 (n/%)        | 2 (5.7)                                      | 35 (100)                   | <b>17 (48.6)</b>           | <b>11 (31.4)</b>           | <b>10 (28.6)</b>           |
| FU3 (n/%)        | 5 (8.3)                                      | 17 (35.4)                  | 48 (100)                   | <b>29 (60.4)</b>           | <b>21 (43.8)</b>           |
| FU4 (n/%)        | 8 (13.8)                                     | 12 (20.7)                  | 29 (50.0)                  | 58 (100)                   | <b>30 (51.7)</b>           |
| FU5 (n/%)        | 7 (9.9)                                      | 17 (23.9)                  | 29 (40.8)                  | 40 (42.3)                  | 71 (100)                   |
|                  | eGFR decline $\geq 40\%$ from baseline until |                            |                            |                            |                            |
|                  | 1 <sup>st</sup> year of FU                   | 2 <sup>nd</sup> year of FU | 3 <sup>rd</sup> year of FU | 4 <sup>th</sup> year of FU | 5 <sup>th</sup> year of FU |
| PROVALID (n=860) |                                              |                            |                            |                            |                            |
| FU1 (n/%)        | 5 (100)                                      | <b>1 (20.0)</b>            | <b>1 (20.0)</b>            | <b>1 (20.0)</b>            | <b>1 (20.0)</b>            |
| FU2 (n/%)        | 1 (5.3)                                      | 19 (100)                   | <b>8 (42.1)</b>            | <b>5 (26.3)</b>            | <b>4 (21.1)</b>            |
| FU3 (n/%)        | 3 (12.0)                                     | 8 (32.0)                   | 25 (100)                   | <b>14 (56.0)</b>           | <b>9 (36.0)</b>            |
| FU4 (n/%)        | 4 (11.1)                                     | 9 (25.0)                   | 14 (38.9)                  | 36 (100)                   | <b>20 (55.6)</b>           |
| FU5 (n/%)        | 5 (11.9)                                     | 10 (23.8)                  | 15 (35.7)                  | 20 (47.6)                  | 42 (100)                   |

FU: follow up; bold numbers: Number of individuals (%) persistently meeting the definition of eGFR decline over time

Supplementary table 3

Intra-individual stability of an eGFR decline  $\geq 30\%$  of patients on stable medication in the PROVALID study over time

|                                                                                                                             | eGFR decline $\geq 30\%$ from baseline until |                            |                            |                            |                            |
|-----------------------------------------------------------------------------------------------------------------------------|----------------------------------------------|----------------------------|----------------------------|----------------------------|----------------------------|
|                                                                                                                             | 1 <sup>st</sup> year of FU                   | 2 <sup>nd</sup> year of FU | 3 <sup>rd</sup> year of FU | 4 <sup>th</sup> year of FU | 5 <sup>th</sup> year of FU |
| RAAS inhibitors and SGLT2 inhibitors stable (PROVALID) (n=552)                                                              |                                              |                            |                            |                            |                            |
| FU1 (n/%)                                                                                                                   | 18 (100)                                     | <b>5 (27.8)</b>            | <b>3 (16.7)</b>            | <b>3 (16.7)</b>            | <b>3 (16.7)</b>            |
| FU2 (n/%)                                                                                                                   | 5 (13.2)                                     | 38 (100)                   | <b>19 (50.0)</b>           | <b>14 (36.8)</b>           | <b>12 (31.6)</b>           |
| FU3 (n/%)                                                                                                                   | 5 (10.4)                                     | 19 (39.6)                  | 48 (100)                   | <b>30 (62.5)</b>           | <b>23 (47.9)</b>           |
| FU4 (n/%)                                                                                                                   | 10 (16.7)                                    | 18 (30.0)                  | 30 (50.0)                  | 60 (100)                   | <b>35 (58.3)</b>           |
| FU5 (n/%)                                                                                                                   | 11 (15.3)                                    | 22 (30.6)                  | 29 (40.3)                  | 35 (48.6)                  | 72 (100)                   |
|                                                                                                                             | eGFR decline $\geq 30\%$ from baseline until |                            |                            |                            |                            |
|                                                                                                                             | 1 <sup>st</sup> year of FU                   | 2 <sup>nd</sup> year of FU | 3 <sup>rd</sup> year of FU | 4 <sup>th</sup> year of FU | 5 <sup>th</sup> year of FU |
| RAAS inhibitors, SGLT2 inhibitors, calcium antagonists, diuretics and non steroidal anti-inflammatory agents stable (n=277) |                                              |                            |                            |                            |                            |
| FU1 (n/%)                                                                                                                   | 6 (100)                                      | <b>2 (33.3)</b>            | <b>1 (16.7)</b>            | <b>1 (16.7)</b>            | <b>1 (16.7)</b>            |
| FU2 (n/%)                                                                                                                   | 2 (11.1)                                     | 18 (100)                   | <b>9 (50.0)</b>            | <b>8 (44.4)</b>            | <b>7 (38.9)</b>            |
| FU3 (n/%)                                                                                                                   | 1 (6.3)                                      | 9 (56.3)                   | 16 (100)                   | <b>10 (62.5)</b>           | <b>8 (50.0)</b>            |
| FU4 (n/%)                                                                                                                   | 1 (3.7)                                      | 10 (37.0)                  | 10 (37.0)                  | 27 (100)                   | <b>13 (48.1)</b>           |
| FU5 (n/%)                                                                                                                   | 4 (13.8)                                     | 11 (37.9)                  | 9 (31.0)                   | 13 (44.8)                  | 29 (100)                   |

FU: follow up; bold numbers: Number of individuals (%) persistently meeting the definition of eGFR decline over time

Supplementary table 4

Intra-individual stability of an eGFR decline  $\geq 25\%$ ,  $\geq 35\%$  and  $\geq 40\%$  for the PROVALID cohort on stable RAAS blocking and SGLT-2 inhibitor therapy over time

|                  | eGFR decline $\geq 25\%$ from baseline until |                            |                            |                            |                            |
|------------------|----------------------------------------------|----------------------------|----------------------------|----------------------------|----------------------------|
|                  | 1 <sup>st</sup> year of FU                   | 2 <sup>nd</sup> year of FU | 3 <sup>rd</sup> year of FU | 4 <sup>th</sup> year of FU | 5 <sup>th</sup> year of FU |
| PROVALID (n=552) |                                              |                            |                            |                            |                            |
| FU1 (n/%)        | 35 (100)                                     | <b>21 (60.0)</b>           | <b>13 (37.1)</b>           | <b>10 (28.6)</b>           | <b>8 (22.9)</b>            |
| FU2 (n/%)        | 21 (33.3)                                    | 63 (100)                   | <b>34 (54.0)</b>           | <b>26 (41.3)</b>           | <b>23 (36.5)</b>           |
| FU3 (n/%)        | 19 (23.5)                                    | 34 (42.0)                  | 81 (100)                   | <b>55 (67.9)</b>           | <b>45 (55.6)</b>           |
| FU4 (n/%)        | 18 (19.8)                                    | 34 (36.4)                  | 55 (60.4)                  | 91 (100)                   | <b>61 (67.0)</b>           |
| FU5 (n/%)        | 21 (19.1)                                    | 40 (36.4)                  | 53 (48.2)                  | 61 (55.5)                  | 110 (100)                  |
|                  | eGFR decline $\geq 35\%$ from baseline until |                            |                            |                            |                            |
|                  | 1 <sup>st</sup> year of FU                   | 2 <sup>nd</sup> year of FU | 3 <sup>rd</sup> year of FU | 4 <sup>th</sup> year of FU | 5 <sup>th</sup> year of FU |
| PROVALID (n=552) |                                              |                            |                            |                            |                            |
| FU1 (n/%)        | 6 (100)                                      | <b>1 (16.7)</b>            | <b>1 (16.7)</b>            | <b>1 (16.7)</b>            | <b>1 (16.7)</b>            |
| FU2 (n/%)        | 1 (4.3)                                      | 23 (100)                   | <b>10 (43.5)</b>           | <b>9 (39.1)</b>            | <b>8 (34.8)</b>            |
| FU3 (n/%)        | 2 (6.7)                                      | 10 (33.3)                  | 30 (100)                   | <b>21 (70.0)</b>           | <b>15 (50.0)</b>           |
| FU4 (n/%)        | 4 (10.3)                                     | 10 (25.6)                  | 21 (53.8)                  | 39 (100)                   | <b>22 (56.4)</b>           |
| FU5 (n/%)        | 4 (9.3)                                      | 12 (27.9)                  | 18 (41.9)                  | 22 (51.2)                  | 43 (100)                   |
|                  | eGFR decline $\geq 40\%$ from baseline until |                            |                            |                            |                            |
|                  | 1 <sup>st</sup> year of FU                   | 2 <sup>nd</sup> year of FU | 3 <sup>rd</sup> year of FU | 4 <sup>th</sup> year of FU | 5 <sup>th</sup> year of FU |
| PROVALID (n=552) |                                              |                            |                            |                            |                            |
| FU1 (n/%)        | 2 (100)                                      | <b>1 (0.0)</b>             | <b>1 (50.0)</b>            | <b>1 (50.0)</b>            | <b>1 (50.0)</b>            |
| FU2 (n/%)        | 1 (8.3)                                      | 12 (100)                   | <b>4 (33.3)</b>            | <b>4 (33.3)</b>            | <b>3 (25.0)</b>            |
| FU3 (n/%)        | 2 (11.8)                                     | 4 (23.5)                   | 17 (100)                   | <b>11 (64.7)</b>           | <b>8 (47.1)</b>            |
| FU4 (n/%)        | 2 (8.0)                                      | 8 (32.0)                   | 11 (44.0)                  | 25 (100)                   | <b>16 (64.0)</b>           |
| FU5 (n/%)        | 2 (7.1)                                      | 7 (25.0)                   | 10 (35.7)                  | 16 (57.2)                  | 28 (100)                   |

FU: follow up; bold numbers: Number of individuals (%) persistently meeting the definition of eGFR decline over time

Supplementary table 5

Intra-individual stability of an eGFR decline  $\geq 5$  ml/min/1.73m<sup>2</sup>/year in a cohort of patients with stable RAAS and SGLT-2 inhibitor therapy in the PROVALID study over time

|                  | eGFR decline $\geq 5$ ml/min/1.73m <sup>2</sup> /year |                   |                  |                  |
|------------------|-------------------------------------------------------|-------------------|------------------|------------------|
|                  | 2nd year of FU                                        | 3rd year of FU    | 4th year of FU   | 5th year of FU   |
| PROVALID (n=552) |                                                       |                   |                  |                  |
| FU2 (n/%)        | 184 (100)                                             | <b>107 (58.2)</b> | <b>69 (37.5)</b> | <b>49 (26.6)</b> |
| FU3 (n/%)        | 107 (83.6)                                            | 128(100)          | <b>73 (57.0)</b> | <b>52 (40.6)</b> |
| FU4 (n/%)        | 69 (82.1)                                             | 73 (86.9)         | 84(100)          | 52 (61.9)        |
| FU5 (n/%)        | 49 (76.6)                                             | 52 (81.3)         | 52 (81.3)        | 64 (100)         |

FU: follow up; bold numbers: Number of individuals (%) persistently meeting the definition of eGFR decline over time. The calculation of the slopes is based on linear regressions using at least 3 eGFR observations for each patient. For this reason, a comparison between baseline and FU1 is missing.

Supplementary table 6

Intra-individual stability of an eGFR decline  $\geq 30\%$  in different eGFR-cohorts in the PROVALID population over time

|                               | eGFR decline $\geq 30\%$ from baseline until |                            |                            |                            |                            |
|-------------------------------|----------------------------------------------|----------------------------|----------------------------|----------------------------|----------------------------|
|                               | 1 <sup>st</sup> year of FU                   | 2 <sup>nd</sup> year of FU | 3 <sup>rd</sup> year of FU | 4 <sup>th</sup> year of FU | 5 <sup>th</sup> year of FU |
| eGFR < 60 ml/min (n=149)      |                                              |                            |                            |                            |                            |
| FU1 (n/%)                     | 4 (100)                                      | <b>1 (25.0)</b>            | <b>1 (25.0)</b>            | <b>1 (25.0)</b>            | <b>1 (25.0)</b>            |
| FU2 (n/%)                     | 1 (9.1)                                      | 11 (100)                   | <b>7 (63.5)</b>            | <b>4 (36.4)</b>            | <b>4 (36.4)</b>            |
| FU3 (n/%)                     | 2 (11.8)                                     | 7 (41.2)                   | 17 (100)                   | <b>10 (58.8)</b>           | <b>8 (47.1)</b>            |
| FU4 (n/%)                     | 3 (20.0)                                     | 4 (26.7)                   | 10 (66.7)                  | 15 (100)                   | <b>11 (73.3)</b>           |
| FU5 (n/%)                     | 3 (18.8)                                     | 7 (43.8)                   | 10 (62.5)                  | 11 (68.8)                  | 16 (100)                   |
| eGFR $\geq 60$ ml/min (n=711) |                                              |                            |                            |                            |                            |
| FU1 (n/%)                     | 21 (100)                                     | <b>5 (23.8)</b>            | <b>3 (14.3)</b>            | <b>3 (14.3)</b>            | <b>3 (14.3)</b>            |
| FU2 (n/%)                     | 5 (11.4)                                     | 44 (100)                   | <b>22 (50.0)</b>           | <b>16 (36.4)</b>           | <b>12 (27.3)</b>           |
| FU3 (n/%)                     | 6 (10.7)                                     | 22 (39.3)                  | 56 (100)                   | <b>34 (60.7)</b>           | <b>25 (44.6)</b>           |
| FU4 (n/%)                     | 12 (15.2)                                    | 22 (27.8)                  | 34 (43.0)                  | 79 (100)                   | <b>42 (53.2)</b>           |
| FU5 (n/%)                     | 11 (10.9)                                    | 25 (24.8)                  | 34 (33.7)                  | 42 (41.6)                  | 101 (100)                  |

FU: follow up; bold numbers: Number of individuals (%) persistently meeting the definition of eGFR decline over time.

Supplementary table 7

Intra-individual stability of eGFR decline  $\geq 5$  ml/min/1.73m<sup>2</sup>/year for different eGFR-cohorts in the PROVALID study over time

|                               | eGFR decline $\geq 5$ ml/min/1.73m <sup>2</sup> /year |                   |                   |                  |
|-------------------------------|-------------------------------------------------------|-------------------|-------------------|------------------|
|                               | 2nd year of FU                                        | 3rd year of FU    | 4th year of FU    | 5th year of FU   |
| eGFR < 60 ml/min (n=149)      |                                                       |                   |                   |                  |
| FU2 (n/%)                     | 18 (100)                                              | <b>9 (60.0)</b>   | <b>3 (16.7)</b>   | <b>1 (5.6)</b>   |
| FU3 (n/%)                     | 9 (69.2)                                              | 13 (100)          | <b>5 (38.5)</b>   | <b>2 (15.4)</b>  |
| FU4 (n/%)                     | 3 (60.0)                                              | 5 (100)           | 5 (100)           | <b>2 (40.0)</b>  |
| FU5 (n/%)                     | 1 (50.0)                                              | 2 (100)           | 2 (100)           | 2 (100)          |
| eGFR $\geq 60$ ml/min (n=711) |                                                       |                   |                   |                  |
| FU2 (n/%)                     | 270 (100)                                             | <b>160 (59.3)</b> | <b>109 (40.4)</b> | <b>78 (28.9)</b> |
| FU3 (n/%)                     | 160 (82.9)                                            | 193 (100)         | <b>114 (59.1)</b> | <b>78 (40.4)</b> |
| FU4 (n/%)                     | 109 (76.8)                                            | 114 (80.3)        | 142 (100)         | <b>85 (59.9)</b> |
| FU5 (n/%)                     | 78 (75.0)                                             | 78 (75.0)         | 85 (81.7)         | 105 (100)        |

FU: follow up; bold numbers: Number of individuals (%) persistently meeting the definition of eGFR decline over time.



Supplementary table 8

Intra-individual stability of an eGFR decline  $\geq 30\%$  for different urine albumin-to-creatinine ratios (UACR) cohorts in the PROVALID study over time

|                             | eGFR decline $\geq 30\%$ from baseline until |                            |                            |                            |                            |
|-----------------------------|----------------------------------------------|----------------------------|----------------------------|----------------------------|----------------------------|
|                             | 1 <sup>st</sup> year of FU                   | 2 <sup>nd</sup> year of FU | 3 <sup>rd</sup> year of FU | 4 <sup>th</sup> year of FU | 5 <sup>th</sup> year of FU |
| UACR < 30 mg/g (n=691)      |                                              |                            |                            |                            |                            |
| FU1 (n/%)                   | 16 (100)                                     | <b>4 (25.0)</b>            | <b>3 (18.8)</b>            | <b>3 (18.8)</b>            | <b>3 (18.8)</b>            |
| FU2 (n/%)                   | 4 (10.8)                                     | 37 (100)                   | <b>19 (51.4)</b>           | <b>13 (35.1)</b>           | <b>10 (27.0)</b>           |
| FU3 (n/%)                   | 6 (12.2)                                     | 19 (38.8)                  | 49 (100)                   | <b>30 (61.2)</b>           | <b>22 (44.9)</b>           |
| FU4 (n/%)                   | 10 (15.4)                                    | 17 (26.2)                  | 30 (46.2)                  | 65 (100)                   | <b>33 (50.8)</b>           |
| FU5 (n/%)                   | 9 (10.6)                                     | 19 (22.4)                  | 31 (36.5)                  | 33 (38.8)                  | 85 (100)                   |
| UACR $\geq$ 30 mg/g (n=169) |                                              |                            |                            |                            |                            |
| FU1 (n/%)                   | 9 (100)                                      | <b>2 (22.2)</b>            | <b>1 (11.1)</b>            | <b>1 (11.1)</b>            | <b>1 (11.1)</b>            |
| FU2 (n/%)                   | 2 (11.1)                                     | 18 (100)                   | <b>10 (55.6)</b>           | <b>7 (38.9)</b>            | <b>6 (33.3)</b>            |
| FU3 (n/%)                   | 2 (8.3)                                      | 10 (41.7)                  | 24 (100)                   | <b>14 (58.3)</b>           | <b>11 (45.8)</b>           |
| FU4 (n/%)                   | 5 (17.2)                                     | 9 (31.0)                   | 14 (48.3)                  | 29 (100)                   | <b>20 (69.0)</b>           |
| FU5 (n/%)                   | 5 (15.6)                                     | 13 (40.6)                  | 13 (40.6)                  | 20 (62.5)                  | 32 (100)                   |

FU: follow up; bold numbers: Number of individuals (%) persistently meeting the definition of eGFR decline over time.

Supplementary table 9

Intra-individual stability of an eGFR decline  $\geq 5$  ml/min/1.73m<sup>2</sup>/year for different urine albumin-to-creatinine ratios (UACR) subgroups in the PROVALID study over time

|                             | eGFR decline $\geq 5$ ml/min/1.73m <sup>2</sup> /year |                   |                  |                  |
|-----------------------------|-------------------------------------------------------|-------------------|------------------|------------------|
|                             | 2nd year of FU                                        | 3rd year of FU    | 4th year of FU   | 5th year of FU   |
| UACR < 30 mg/g (n=691)      |                                                       |                   |                  |                  |
| FU2 (n/%)                   | 227 (100)                                             | <b>128 (56.4)</b> | <b>83 (36.6)</b> | <b>57 (25.1)</b> |
| FU3 (n/%)                   | 128 (81.1)                                            | 158 (100)         | <b>90 (57.0)</b> | <b>57 (36.1)</b> |
| FU4 (n/%)                   | 83 (74.8)                                             | 90 (81.1)         | 111 (100)        | <b>64 (57.7)</b> |
| FU5 (n/%)                   | 57 (71.3)                                             | 57 (71.3)         | 64 (80.0)        | 80 (100)         |
| UACR $\geq$ 30 mg/g (n=169) |                                                       |                   |                  |                  |
| FU2 (n/%)                   | 61 (100)                                              | <b>41 (67.2)</b>  | <b>29 (47.5)</b> | <b>22 (36.1)</b> |
| FU3 (n/%)                   | 41 (85.4)                                             | 48 (100)          | <b>29 (60.4)</b> | <b>23 (47.9)</b> |
| FU4 (n/%)                   | 29 (80.6)                                             | 29 (80.6)         | 36 (100)         | <b>23 (63.9)</b> |
| FU5 (n/%)                   | 22 (84.6)                                             | 23 (88.5)         | 23 (88.5)        | 26 (100)         |

FU: follow up; bold numbers: Number of individuals (%) persistently meeting the definition of eGFR decline over time.

Supplementary table 10a:

Characteristics of prognostic biomarker studies using a two point-method to describe eGFR decline

| Reference                           | N    | Follow-up (months) | Baseline eGFR (ml/min /1.73m <sup>2</sup> ) | Definition of kidney function decline                                                                                                                      |
|-------------------------------------|------|--------------------|---------------------------------------------|------------------------------------------------------------------------------------------------------------------------------------------------------------|
| Chung et al <sup>1</sup>            | 676  | 48                 | 83                                          | eGFR decline ≥ 25 %                                                                                                                                        |
| Peters et al <sup>2</sup>           | 345  | 48                 | 80.6                                        | - ≥30 % eGFR decline<br>- incident eGFR < 60<br>- GFR-decline ≥5ml/min/ 1,73m <sup>2</sup> /year<br>- “rapid decline”: - 4 ml/min/1,73m <sup>2</sup> /year |
| Mise et al <sup>3</sup>             | 675  | 48                 | 71.4                                        | eGFR decline ≥ 30 % or incident dialysis                                                                                                                   |
| Lin et al <sup>4</sup>              | 516  | 112                | 84.3                                        | eGFR decline ≥ 25 %                                                                                                                                        |
| Velho et al <sup>5</sup>            | 3101 | 72                 | 79.2                                        | Doubling of sCr or ESRD                                                                                                                                    |
| Fernandez-Juarez et al <sup>6</sup> | 103  | 32                 | 47                                          | 50% increase in sCr (increase had to be confirmed after 1 month) or incident ESRD                                                                          |
| Chang et al <sup>7</sup>            | 2367 | 55.2               | 67.3                                        | Stable: CKD stage stable<br>Regression: change of CKD stage downwards<br>Progression: change of CKD stage upwards                                          |
| Von Scholten et al <sup>8</sup>     | 177  | 58.8               | 89.8                                        | eGFR decline > 30 %                                                                                                                                        |
| Nadkarni et al <sup>9</sup>         | 380  | 60                 | 88.6                                        | ≥ 40 % vs. ≤ 10 % eGFR decline (had to be confirmed in 2 or more visits, at least 3 months apart)                                                          |
| Satirapoj et al <sup>10</sup>       | 303  | 12.3               | 50                                          | ≥ 25 % eGFR decline per year                                                                                                                               |
| Saulnier et al <sup>11</sup>        | 1135 | 52.8               | 76                                          | ≥ 40 % eGFR decline from baseline<br>Rapid: ≥5 ml/min/1,73m <sup>2</sup> /year (absolute GFR slopes determined by linear regression)                       |

|                                     |      |      |      |                                                                                                                                                                              |
|-------------------------------------|------|------|------|------------------------------------------------------------------------------------------------------------------------------------------------------------------------------|
|                                     |      |      |      | (at least 3 measures, at least 6 months between first and last)<br>Annual GFR trajectory<br>Global pattern of absolute annual eGFR decline                                   |
| Jenks et al <sup>12</sup>           | 701  | 80.4 | 86   | Two eGFR values < 60 ml/min at least 3 months apart with a > 25 % decline                                                                                                    |
| Tan et al <sup>13</sup>             | 1320 | 108  | 84.5 | Doubling of sCr or incident ESRD                                                                                                                                             |
| Fountoulakis et al <sup>14</sup>    | 101  | 108  | 90.7 | > 50 % decline in GFR (linear regression model of time on GFR was created and the slope of the regression line was used to estimate the patient's changes of eGFR over time) |
| Fan et al <sup>15</sup>             | 80   | 24   | 115  | Doubling of sCr or ESRD or renal death                                                                                                                                       |
| Hanai et al <sup>16</sup>           | 7033 | 66   | 69.9 | ≥ 30 % decrease in eGFR (at least for 3 months) or ESRD<br>≥ 50 % decrease in eGFR or ESRD                                                                                   |
| Rotbain Curovic et al <sup>17</sup> | 192  | 73.2 | 89   | > 30 % decline in eGFR                                                                                                                                                       |
| Bhensdadia et al <sup>18</sup>      | 204  | 72   | 85   | ≥ 50 % increase in sCr                                                                                                                                                       |
| Chauhan et al <sup>19</sup>         | 1245 | 55.2 | 74.3 | > 40 % decline in eGFR or ESRD                                                                                                                                               |
| Colombo et al <sup>20</sup>         | 840  | 80.2 | 55.1 | > 20 % decline in eGFR                                                                                                                                                       |

Supplementary table 10b:

Characteristics of prognostic biomarker studies using a slope calculation to describe eGFR decline

| Reference                      | N    | Follow-up (months) | Baseline eGFR (ml/min /1.73m <sup>2</sup> ) | Definition of kidney function decline                                                                                                                                                                                                           |
|--------------------------------|------|--------------------|---------------------------------------------|-------------------------------------------------------------------------------------------------------------------------------------------------------------------------------------------------------------------------------------------------|
| Peters et al <sup>2</sup>      | 345  | 48                 | 80.6                                        | - GFR-decline $\geq 5$ ml/min/ 1,73m <sup>2</sup> /year<br>- "rapid decline": - 4 ml/min/1,73m <sup>2</sup> /year                                                                                                                               |
| Pena et al <sup>21</sup>       | 82   | 48                 | 77.9                                        | Accelerated decline: $\geq 3$ ml/min/1,73m <sup>2</sup> /year                                                                                                                                                                                   |
| Solini et al <sup>22</sup>     | 286  | 36                 | 85                                          | eGFR decline $> 10$ ml/min/1,73m <sup>2</sup>                                                                                                                                                                                                   |
| Liu et al <sup>23</sup>        | 422  | 48                 | 80.7                                        | Progression: $\geq 3$ ml/min/1,73m <sup>2</sup> /year decline (at least 3 measures, at least 1 year follow-up)<br>Stable: $\pm 2$ ml/min/1,73m <sup>2</sup> /year (at least 5 years of follow-up)                                               |
| Saulnier et al <sup>11</sup>   | 1135 | 52.8               | 76                                          | Rapid: $\geq 5$ ml/min/1,73m <sup>2</sup> /year (absolute GFR slopes determined by linear regression (at least 3 measures, at least 6 months between first and last)<br>Annual GFR trajectory<br>Global pattern of absolute annual eGFR decline |
| Bhensdadia et al <sup>18</sup> | 204  | 72                 | 85                                          | minus 3,3 % eGFR per year                                                                                                                                                                                                                       |
| Nielsen et al <sup>24</sup>    | 177  | 42                 | 90                                          | Rate of decline ml/min/1,73m <sup>2</sup> /year                                                                                                                                                                                                 |
| Yamamoto et al <sup>25</sup>   | 161  | 24                 | 89.6                                        | $\geq 3$ ml/min/year averaged over 2 years                                                                                                                                                                                                      |
| Chou et al <sup>26</sup>       | 140  | 20.4               | 86.4                                        | eGFR decline rate =<br>$\frac{eGFR_{last} - eGFR_{baseline}}{eGFR_{baseline} \times \text{follow-up}}$                                                                                                                                          |
| Boertien et al <sup>27</sup>   | 756  | 78                 | 65                                          | Annual change in log transformed eGFR were calculated from the slope of the regression line                                                                                                                                                     |

|                               |      |    |      |                                                                        |
|-------------------------------|------|----|------|------------------------------------------------------------------------|
|                               |      |    |      | through all available eGFR values (at least 3 values, median 6 values) |
| Narayanan et al <sup>28</sup> | 436  | 96 | 72   | Longitudinal change in eGFR                                            |
| Agarwal et al <sup>29</sup>   | 67   | 22 | 43   | - Slope progression based on inspection<br>- ESRD                      |
| Heinzel et al <sup>30</sup>   | 481  | 24 | 84   | Progression: 4-5 <sup>th</sup> quintile of eGFR slope                  |
| Mayer et al <sup>31</sup>     | 1765 | 48 | 49.2 | Annual eGFR loss                                                       |

## References:

- 1 Chung, H. F. *et al.* Association of n-3 polyunsaturated fatty acids and inflammatory indicators with renal function decline in type 2 diabetes. *Clinical nutrition* **34**, 229-234, doi:10.1016/j.clnu.2014.02.009 (2015).
- 2 Peters, K. E. *et al.* Identification of Novel Circulating Biomarkers Predicting Rapid Decline in Renal Function in Type 2 Diabetes: The Fremantle Diabetes Study Phase II. *Diabetes care* **40**, 1548-1555, doi:10.2337/dc17-0911 (2017).
- 3 Mise, K. *et al.* Identification of Novel Urinary Biomarkers for Predicting Renal Prognosis in Patients With Type 2 Diabetes by Glycan Profiling in a Multicenter Prospective Cohort Study: U-CARE Study 1. *Diabetes care* **41**, 1765-1775, doi:10.2337/dc18-0030 (2018).
- 4 Lin, J., Hu, F. B., Mantzoros, C. & Curhan, G. C. Lipid and inflammatory biomarkers and kidney function decline in type 2 diabetes. *Diabetologia* **53**, 263-267, doi:10.1007/s00125-009-1597-z (2010).
- 5 Velho, G. *et al.* Plasma copeptin and renal outcomes in patients with type 2 diabetes and albuminuria. *Diabetes care* **36**, 3639-3645, doi:10.2337/dc13-0683 (2013).
- 6 Fernandez-Juarez, G. *et al.* 25 (OH) vitamin D levels and renal disease progression in patients with type 2 diabetic nephropathy and blockade of the renin-angiotensin system. *Clinical journal of the American Society of Nephrology : CJASN* **8**, 1870-1876, doi:10.2215/CJN.00910113 (2013).
- 7 Chang, Y. H. *et al.* Serum uric acid level as an indicator for CKD regression and progression in patients with type 2 diabetes mellitus-a 4.6-year cohort study. *Diabetes/metabolism research and reviews* **32**, 557-564, doi:10.1002/dmrr.2768 (2016).
- 8 von Scholten, B. J. *et al.* Urinary biomarkers are associated with incident cardiovascular disease, all-cause mortality and deterioration of kidney function in type 2 diabetic patients with microalbuminuria. *Diabetologia* **59**, 1549-1557, doi:10.1007/s00125-016-3937-0 (2016).
- 9 Nadkarni, G. N. *et al.* Association of Urinary Biomarkers of Inflammation, Injury, and Fibrosis with Renal Function Decline: The ACCORD Trial. *Clinical journal of the*

- American Society of Nephrology : CJASN* **11**, 1343-1352, doi:10.2215/CJN.12051115 (2016).
- 10 Satirapoj, B., Aramsaowapak, K., Tangwonglert, T. & Supasyndh, O. Novel Tubular Biomarkers Predict Renal Progression in Type 2 Diabetes Mellitus: A Prospective Cohort Study. *Journal of diabetes research* **2016**, 3102962, doi:10.1155/2016/3102962 (2016).
- 11 Saulnier, P. J. *et al.* Association of Circulating Biomarkers (Adrenomedullin, TNFR1, and NT-proBNP) With Renal Function Decline in Patients With Type 2 Diabetes: A French Prospective Cohort. *Diabetes care* **40**, 367-374, doi:10.2337/dc16-1571 (2017).
- 12 Jenks, S. J. *et al.* Cardiovascular disease biomarkers are associated with declining renal function in type 2 diabetes. *Diabetologia* **60**, 1400-1408, doi:10.1007/s00125-017-4297-0 (2017).
- 13 Tan, K. C. B. *et al.* Galectin-3 is independently associated with progression of nephropathy in type 2 diabetes mellitus. *Diabetologia* **61**, 1212-1219, doi:10.1007/s00125-018-4552-z (2018).
- 14 Fountoulakis, N., Maltese, G., Gnudi, L. & Karalliedde, J. Reduced Levels of Anti-Ageing Hormone Klotho Predict Renal Function Decline in Type 2 Diabetes. *The Journal of clinical endocrinology and metabolism* **103**, 2026-2032, doi:10.1210/jc.2018-00004 (2018).
- 15 Fan, Y. *et al.* Expression of Endothelial Cell Injury Marker Cd146 Correlates with Disease Severity and Predicts the Renal Outcomes in Patients with Diabetic Nephropathy. *Cellular physiology and biochemistry : international journal of experimental cellular physiology, biochemistry, and pharmacology* **48**, 63-74, doi:10.1159/000491663 (2018).
- 16 Hanai, K. *et al.* Effects of uric acid on kidney function decline differ depending on baseline kidney function in type 2 diabetic patients. *Nephrology, dialysis, transplantation : official publication of the European Dialysis and Transplant Association - European Renal Association*, doi:10.1093/ndt/gfy138 (2018).
- 17 Rotbain Curovic, V. *et al.* Urinary tubular biomarkers as predictors of kidney function decline, cardiovascular events and mortality in microalbuminuric type 2 diabetic patients. *Acta diabetologica*, doi:10.1007/s00592-018-1205-0 (2018).
- 18 Bhensdadia, N. M. *et al.* Urine haptoglobin levels predict early renal functional decline in patients with type 2 diabetes. *Kidney international* **83**, 1136-1143, doi:10.1038/ki.2013.57 (2013).
- 19 Chauhan, K. *et al.* Plasma endostatin predicts kidney outcomes in patients with type 2 diabetes. *Kidney Int* **95**, 439-446, doi:10.1016/j.kint.2018.09.019 (2019).
- 20 Colombo, M. *et al.* Serum kidney injury molecule 1 and beta2-microglobulin perform as well as larger biomarker panels for prediction of rapid decline in renal function in type 2 diabetes. *Diabetologia* **62**, 156-168, doi:10.1007/s00125-018-4741-9 (2019).
- 21 Pena, M. J. *et al.* A panel of novel biomarkers representing different disease pathways improves prediction of renal function decline in type 2 diabetes. *PLoS one* **10**, e0120995, doi:10.1371/journal.pone.0120995 (2015).
- 22 Solini, A. *et al.* Prediction of Declining Renal Function and Albuminuria in Patients With Type 2 Diabetes by Metabolomics. *The Journal of clinical endocrinology and metabolism* **101**, 696-704, doi:10.1210/jc.2015-3345 (2016).
- 23 Liu, J. J., Liu, S., Wong, M. D., Gurung, R. L. & Lim, S. C. Urinary Haptoglobin Predicts Rapid Renal Function Decline in Asians With Type 2 Diabetes and Early Kidney Disease.

- The Journal of clinical endocrinology and metabolism* **101**, 3794-3802, doi:10.1210/jc.2016-2094 (2016).
- 24 Nielsen, S. E. *et al.* Tubular markers are associated with decline in kidney function in proteinuric type 2 diabetic patients. *Diabetes research and clinical practice* **97**, 71-76, doi:10.1016/j.diabres.2012.02.007 (2012).
- 25 Yamamoto, C. M. *et al.* Uromodulin mRNA from Urinary Extracellular Vesicles Correlate to Kidney Function Decline in Type 2 Diabetes Mellitus. *American journal of nephrology* **47**, 283-291, doi:10.1159/000489129 (2018).
- 26 Chou, K. M., Lee, C. C., Chen, C. H. & Sun, C. Y. Clinical value of NGAL, L-FABP and albuminuria in predicting GFR decline in type 2 diabetes mellitus patients. *PloS one* **8**, e54863, doi:10.1371/journal.pone.0054863 (2013).
- 27 Boertien, W. E. *et al.* Copeptin, a surrogate marker for arginine vasopressin, is associated with declining glomerular filtration in patients with diabetes mellitus (ZODIAC-33). *Diabetologia* **56**, 1680-1688, doi:10.1007/s00125-013-2922-0 (2013).
- 28 Narayanan, R. P. *et al.* IGFBP2 is a biomarker for predicting longitudinal deterioration in renal function in type 2 diabetes. *Endocrine connections* **1**, 95-102, doi:10.1530/EC-12-0053 (2012).
- 29 Agarwal, R. *et al.* A prospective study of multiple protein biomarkers to predict progression in diabetic chronic kidney disease. *Nephrology, dialysis, transplantation : official publication of the European Dialysis and Transplant Association - European Renal Association* **29**, 2293-2302, doi:10.1093/ndt/gfu255 (2014).
- 30 Heinzl, A. *et al.* Validation of Plasma Biomarker Candidates for the Prediction of eGFR Decline in Patients With Type 2 Diabetes. *Diabetes Care* **41**, 1947-1954, doi:10.2337/dc18-0532 (2018).
- 31 Mayer, G. *et al.* Systems Biology-Derived Biomarkers to Predict Progression of Renal Function Decline in Type 2 Diabetes. *Diabetes care* **40**, 391-397, doi:10.2337/dc16-2202 (2017).
